# Supplementary figures and images for: Control of tillering in rice
Source: Springer Nature journal article supplement (doi:10.1038/nature01518), 2003-04-01

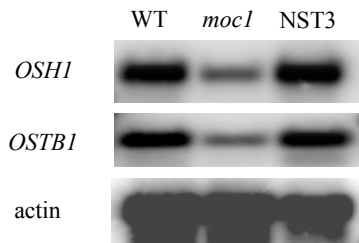

Supplement: 41586_2003_BFnature01518_MOESM3_ESM.pdf [file 41586_2003_BFnature01518_MOESM3_ESM.pdf]
